# Supplementary material for: 8-Quinoline based ligands and their metallic derivatives: A structural and statistical investigation of quinoline π–π stacking interactions
Source: Royal Society of Chemistry journal article supplement (doi:10.1039/b9nj00547a), 2010-01-01
Supplement: b9nj00547a.pdf [file b9nj00547a.pdf]

## Electronic Supporting Information for:

# 8-Quinoline Based Ligands and Their Metallic Derivatives: A Structural and Statistical Investigation of Quinoline $\pi - \pi$ stacking Interactions†

Radu F. Semeniuc,\* Thomas J. Reamer and Mark D. Smith

Correspondance of the Figures with the Schemes within the article:

Scheme 1 → see Fig. S1

Scheme 2 → see Fig. S1

Scheme 3 → see Fig. S1

Scheme 4 → see Fig. S1

Scheme 5 → see Fig. S1

Scheme 6 → see Fig. S1

Scheme 7 → see Fig. S1

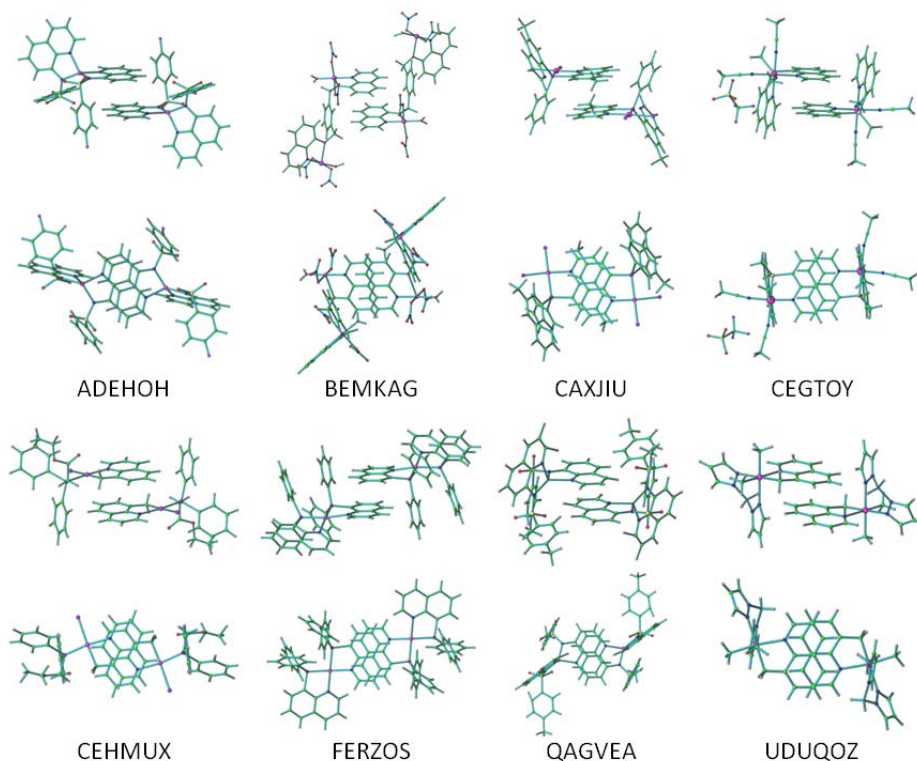

**Fig. S1.** ADEHOH: Ct-Ct = 3.6 Å,  $\perp$  = 3.5 Å,  $\beta$  = 18°, H-Ct = 2.74 Å, C-H-Ct = 153°, H-O = 2.71 Å, C-H-O = 162°; BEMKAG: Ct-Ct = 3.9 Å,  $\perp$  = 3.5 Å,  $\beta$  = 6°, H-Ct = 2.72 Å, C-H-Ct = 156°; CAXJIU: Ct-Ct = 3.7 Å,  $\perp$  = 3.7 Å,  $\beta$  = 6°, H-Ct = 2.76 Å, C-H-Ct = 145°; CEGTOY: Ct-Ct = 3.7 Å,  $\perp$  = 3.6 Å,  $\beta$  = 20.8°, H-Ct = 2.93 Å, C-H-Ct = 165°, H-Ct = 2.55 Å, C-H-Ct = 169°; CEHMUX: Ct-Ct = 3.7 Å,  $\perp$  = 3.6 Å,  $\beta$  = 21.1°, H-Ct = 2.88 Å, C-H-Ct = 166°; FERZOS: Ct-Ct = 3.7 Å,  $\perp$  = 3.5 Å,  $\beta$  = 19.0°, H-Ct = 2.69 Å, C-H-Ct = 164°; QAGVEA: Ct-Ct = 3.56 Å,  $\perp$  = 3.4 Å,  $\beta$  = 18.5°, H-Ct = 2.75 Å, C-H-Ct = 141°; UDUQOZ: Ct-Ct = 3.7 Å,  $\perp$  = 3.5 Å,  $\beta$  = 22.6°, H-Ct = 2.66 Å, C-H-Ct = 175°.

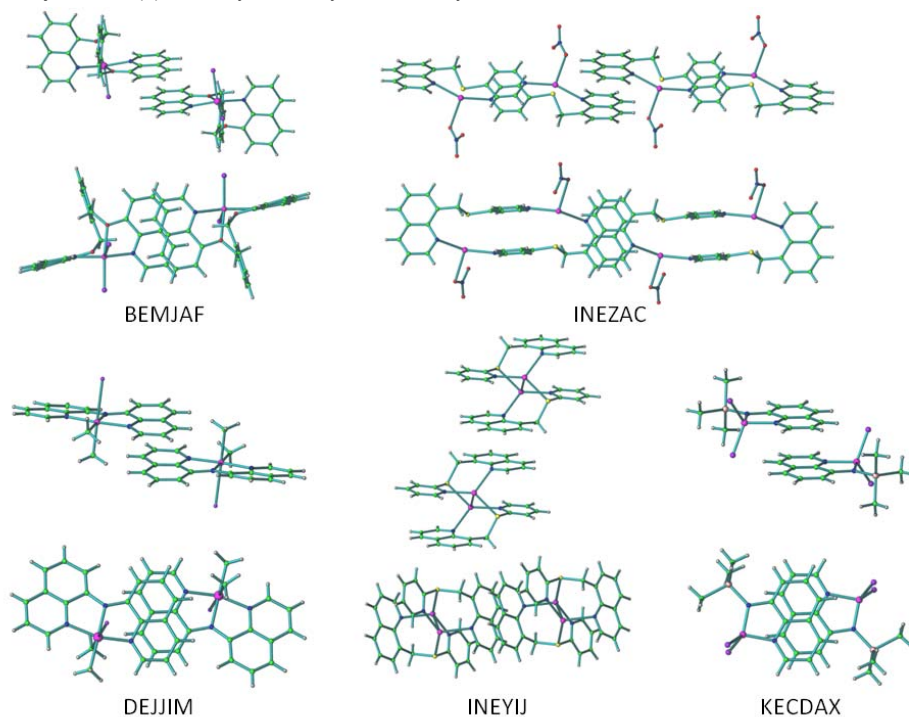

**Fig. S2.** BEMJAF; Ct-Ct = 3.7 Å,  $\perp$  = 3.4 Å,  $\beta$  = 28.8°, H-Cl = 2.91 Å, C-H-Cl = 144°, H-Cl = 2.73 Å, C-H-Cl = 150°; INEZAC; Ct-Ct = 3.7 Å,  $\perp$  = 3.6 Å,  $\beta$  = 19.6°, H-O = 2.6 Å, C-H-O = 140°, H-O = 2.7 Å, C-H-O = 146°; DEJJIM; Ct-Ct = 3.7 Å,  $\perp$  = 3.4 Å,  $\beta$  = 23.9°; INEYIJ; Ct-Ct = 3.8 Å,  $\perp$  = 3.5 Å,  $\beta$  = 24.5°; KECDAX; Ct-Ct = 3.4 Å,  $\perp$  = 3.3 Å,  $\beta$  = 15.3°.

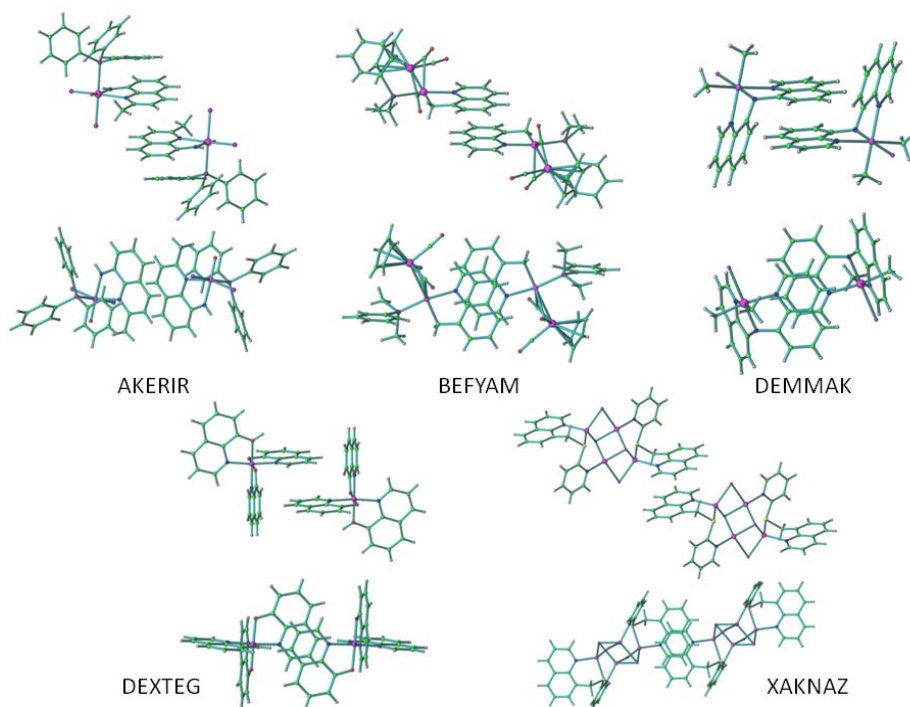

**Fig. S3.** AKERIR; Ct-Ct = 3.6 Å,  $\perp$  = 3.5 Å,  $\beta$  = 20.1°, H-Cl = 3.1 Å, C-H-Cl = 139°, H-Cl = 2.9 Å, C-H-Cl = 144°; BEFYAM; Ct-Ct = 3.6 Å,  $\perp$  = 3.4 Å,  $\beta$  = 21.4°, H-O = 2.6 Å, C-H-O = 143.8°; DEMMAK; Ct-Ct = 3.4 Å,  $\perp$  = 3.4 Å,  $\beta$  = 16°, H-Ct = 2.7 Å, C-H-Ct = 171°; DEXTEG; Ct-Ct = 3.6 Å,  $\perp$  = 3.4 Å,  $\beta$  = 20.2°, H-Ct = 2.5 Å, C-H-Ct = 165°; XAKNAZ; Ct-Ct = 3.7 Å,  $\perp$  = 3.4 Å,  $\beta$  = 23.1°

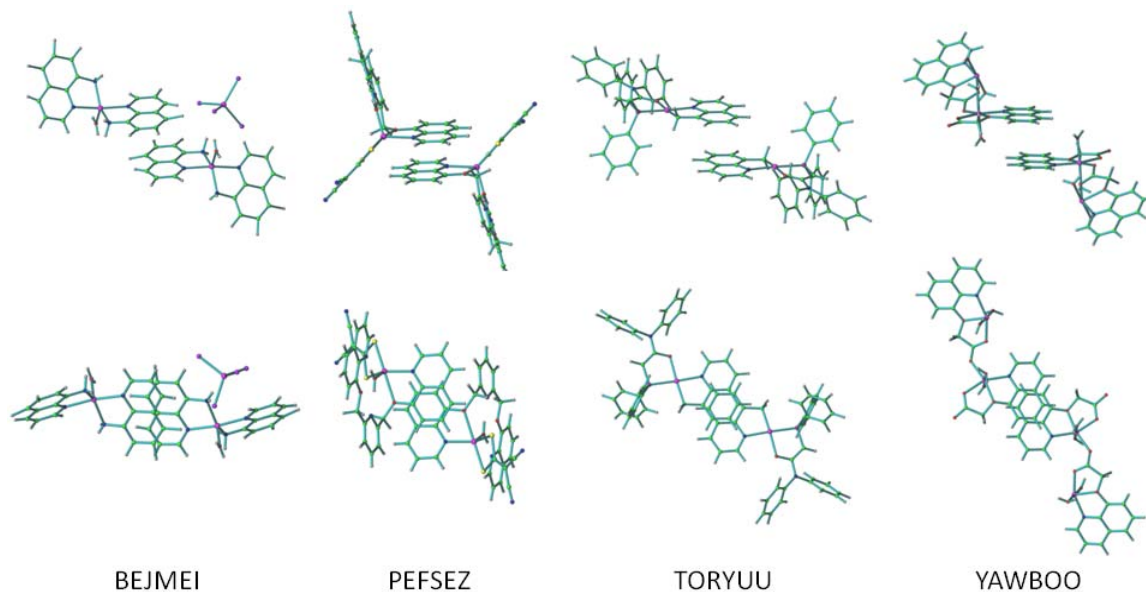

**Fig. S4.** BEJMEI; Ct-Ct = 3.7 Å,  $\perp$  = 3.5 Å,  $\beta$  = 21.7°, H-Cl = 2.89 Å, C-H-Cl = 178°; PEFSEZ; Ct-Ct = 3.5 Å,  $\perp$  = 3.4 Å,  $\beta$  = 15.4°; TORYUU; Ct-Ct = 3.6 Å,  $\perp$  = 3.5 Å,  $\beta$  = 12.7°; YAWBOO; Ct-Ct = 3.7 Å,  $\perp$  = 3.5 Å,  $\beta$  = 19.9°.

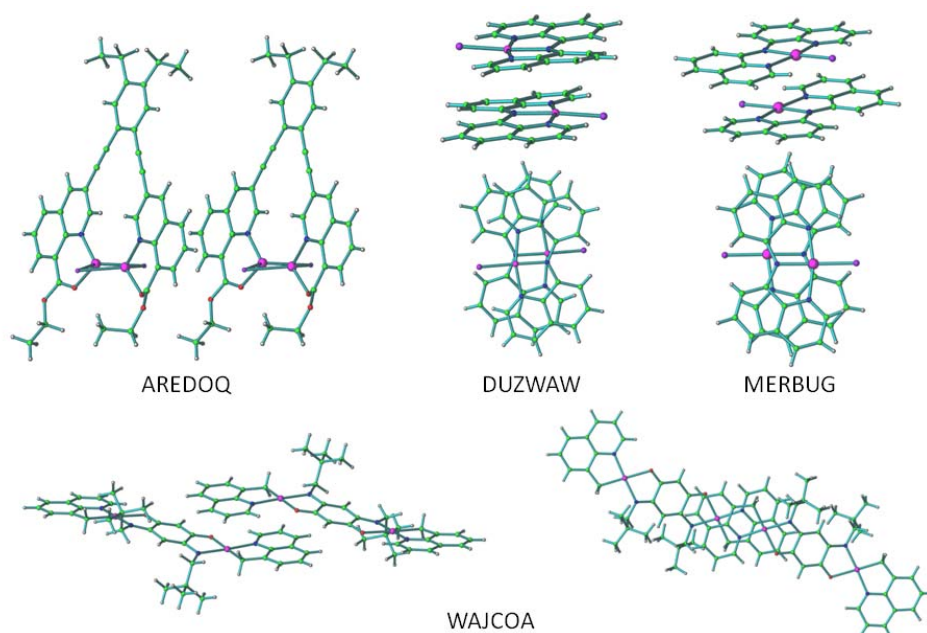

**Fig. S5.** AREDOQ; Ct-Ct = 3.6 Å,  $\perp$  = 3.4 Å,  $\beta$  = 20.2°; DUZWAW; Ct-Ct = 4.5 Å,  $\perp$  = 3.5 Å,  $\beta$  = 39.5°; MERBUG; Ct-Ct = 3.6 Å,  $\perp$  = 3.3 Å,  $\beta$  = 22.7°; WAJCOA; no quinoline interaction observed; Ct-Pd = 3.7 Å,  $\perp$  Pd-Arene distance = 3.5 Å.

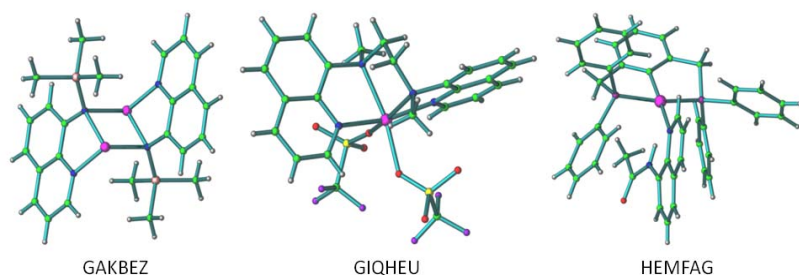

**Fig. S6.** Selected examples of quinoline based compounds with no  $\pi$ - $\pi$  stacking interactions: left, CSD refcode: GAKBEZ; middle, CSD refcode: GIQHEU; right, CSD refcode: HEMFAG.

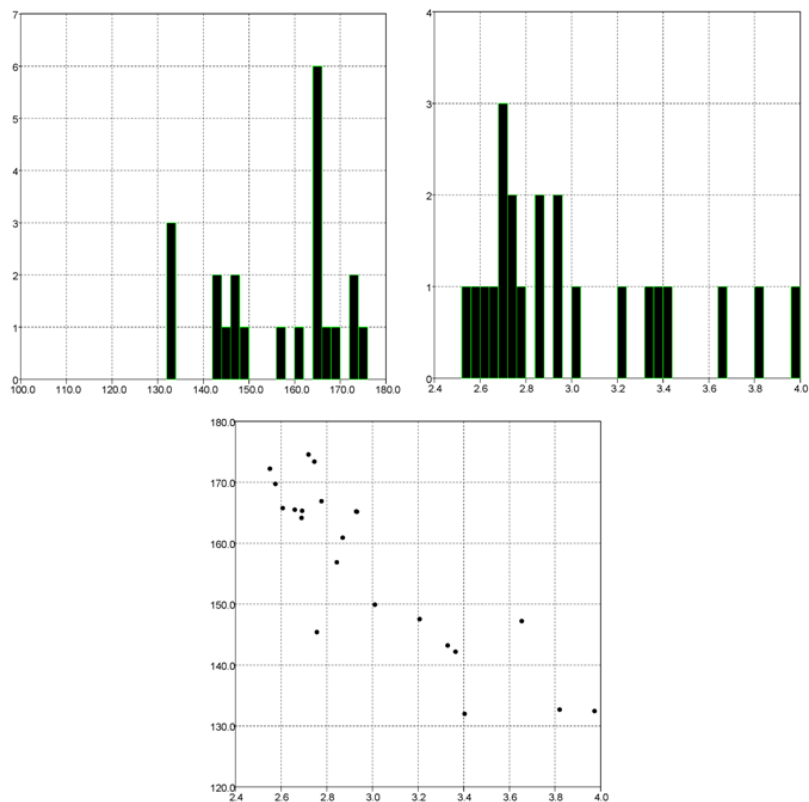

**Fig. S7.** Statistical analysis of the Q\_NM\_Ph case: top-left: histogram for the C-H-Ct angle ( $^{\circ}$ ); top-right: histogram for the H-Ct distance; bottom: scattergram for a correlation between the C-H-Ct angle and H-Ct distance.

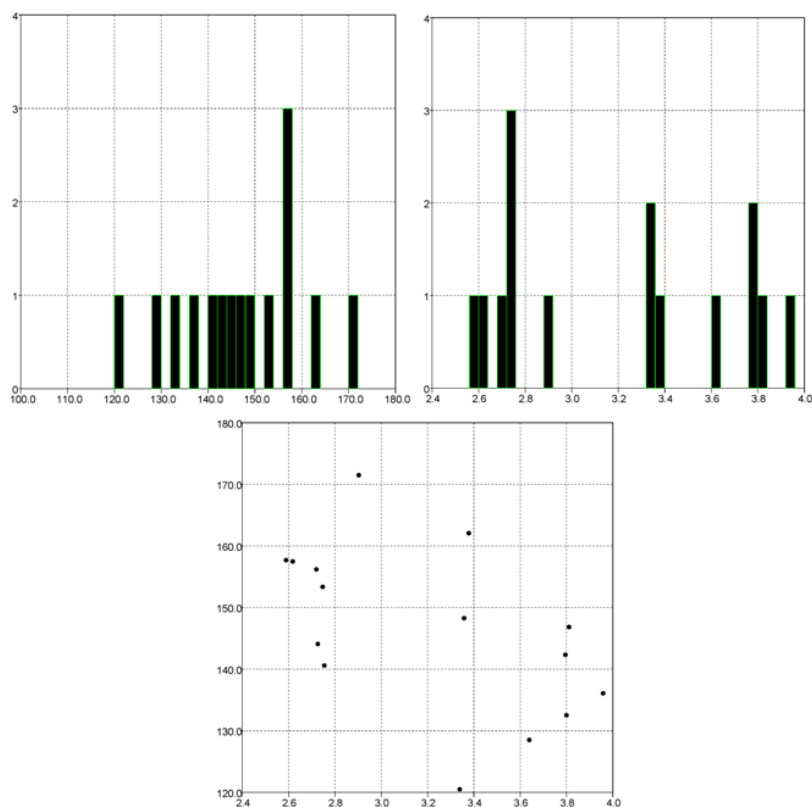

**Fig. S8.** Statistical analysis of the Q\_NM\_NM\_Ph case: top-left: histogram for the C-H-Ct angle ( $^{\circ}$ ); top-right: histogram for the H-Ct distance; bottom: scattergram for a correlation between the C-H-Ct angle and H-Ct distance.
